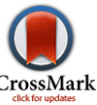

## Correction

# Correction: Bayesian Parameter Inference by Markov Chain Monte Carlo with Hybrid Fitness Measures: Theory and Test in Apoptosis Signal Transduction Network

The *PLOS ONE* Staff

## Notice of Republication

This article was republished on April 21st, 2014, to correct changes to the text, Figure 1, and Table S1. The publisher apologizes for this error. Please download the PDF and Supporting Information again to view the corrected article and supporting table.

## Reference

1. Murakami Y, Takada S (2013) Bayesian Parameter Inference by Markov Chain Monte Carlo with Hybrid Fitness Measures: Theory and Test in Apoptosis Signal Transduction Network. *PLoS ONE* 8(9): e74178. doi:10.1371/journal.pone.0074178

**Citation:** The *PLOS ONE* Staff (2014) Correction: Bayesian Parameter Inference by Markov Chain Monte Carlo with Hybrid Fitness Measures: Theory and Test in Apoptosis Signal Transduction Network. *PLoS ONE* 9(5): e97961. doi:10.1371/journal.pone.0097961

**Published:** May 12, 2014

**Copyright:** © 2014 The *PLOS ONE* Staff. This is an open-access article distributed under the terms of the Creative Commons Attribution License, which permits unrestricted use, distribution, and reproduction in any medium, provided the original author and source are credited.
